# Supplementary material for: Benzyl viologen-assisted simultaneous exfoliation and n-doping of MoS2nanosheets via a solution process
Source: Royal Society of Chemistry journal article supplement (doi:10.1039/c7tc01099k), 2017-01-01
Supplement: c7tc01099k1.pdf [file c7tc01099k1.pdf]

# Benzyl viologen-assisted simultaneous exfoliation and $n$ -doping of MoS<sub>2</sub> nanosheets via a solution process

*Kiyoung Jo<sup>†</sup>, Jaeyoo Choi<sup>†</sup>, and Heesuk Kim<sup>†, ‡, \*</sup>*

<sup>†</sup>Photo-electronic Hybrids Research Center, Korea Institute of Science and Technology (KIST), Seoul 02792, Republic of Korea. <sup>‡</sup> Nano-Materials and Engineering, Korea University of Science and Technology (UST), Daejeon 34113, Republic of Korea.

**KEYWORDS :** MoS<sub>2</sub> nanosheets, benzyl viologen, simultaneous exfoliation and  $n$ -doping, electrical properties, Seebeck coefficient

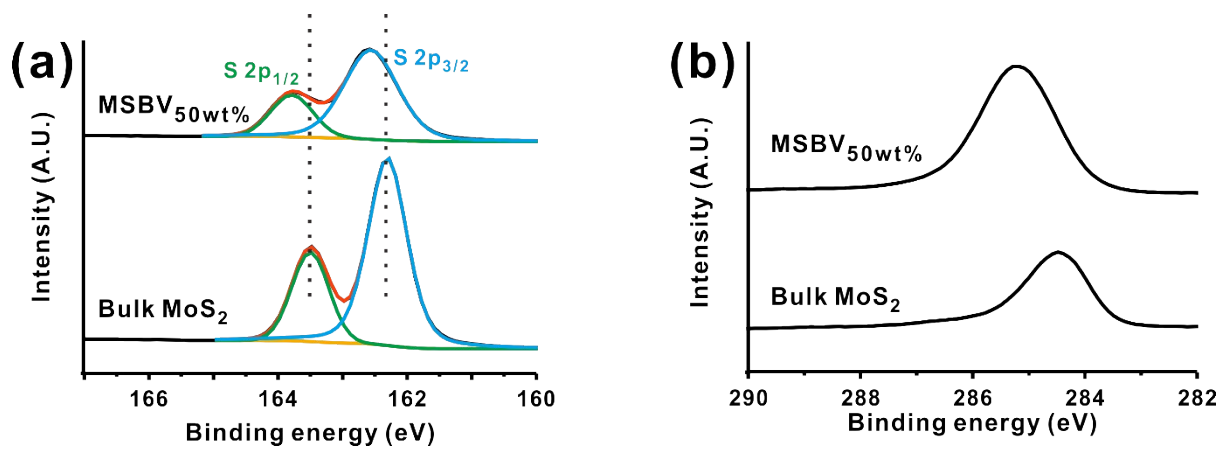

**Fig. S1** XPS spectra of (a) S(2p) and (b) C(1s) peaks of bulk MoS<sub>2</sub> and MSBV<sub>50wt%</sub>.

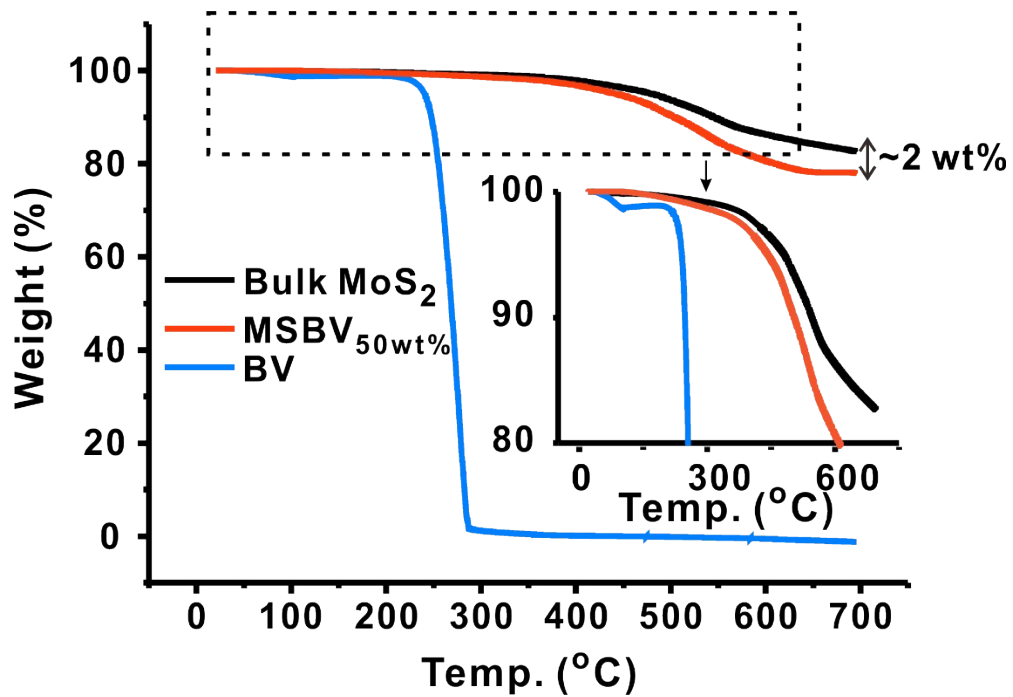

Fig. S2 Thermogravimetric analysis (TGA) data of bulk MoS<sub>2</sub>, BVCl<sub>2</sub>, and MSBV<sub>50wt%</sub>.

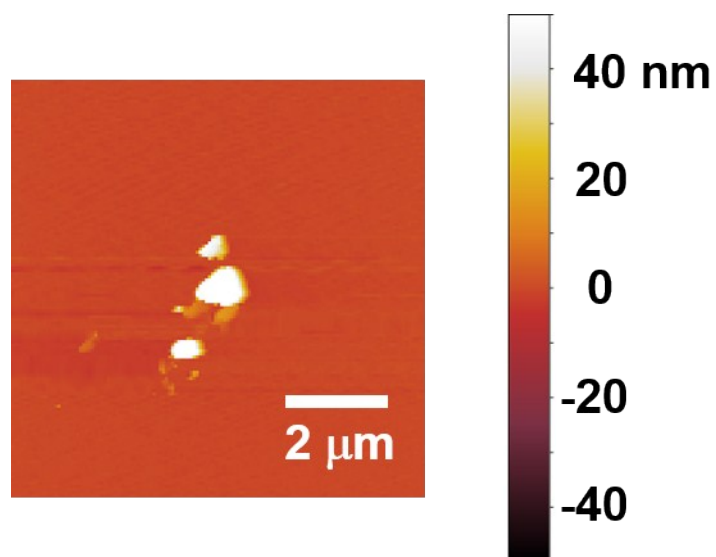

**Fig. S3** AFM image of MSBV<sub>0wt%</sub> which denotes MoS<sub>2</sub> reacted only with hydrazine.

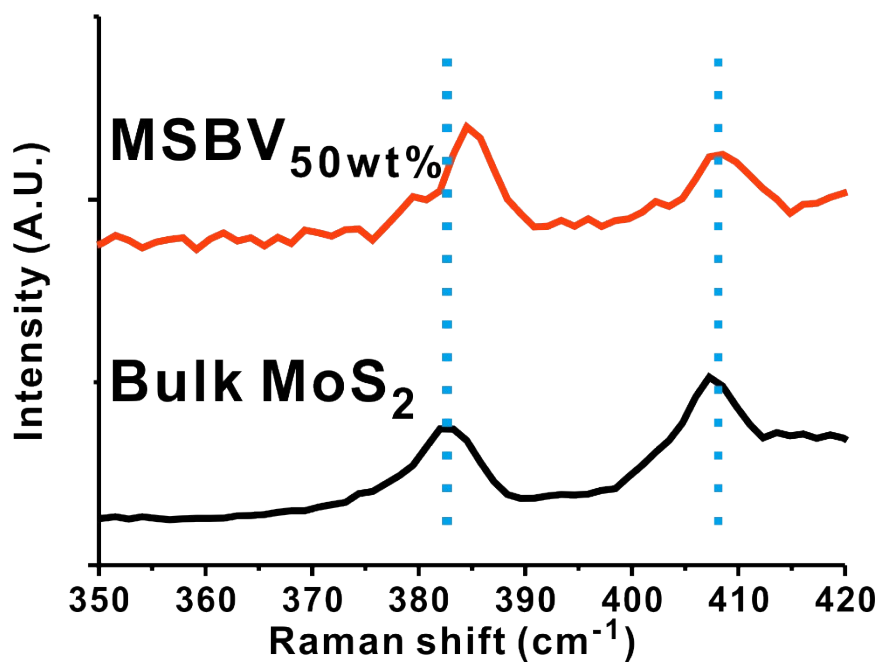

**Fig. S4** Raman spectrum of bulk MoS<sub>2</sub> and MSBV<sub>50wt%</sub>.

The peak separation between  $A_{1g}$  and  $E_{2g}^1$  mode is dependent on the number of layers.<sup>1</sup> As shown in Figure S4, bulk MoS<sub>2</sub> has its  $A_{1g}$  and  $E_{2g}^1$  modes at 407.7 and 382.5 cm<sup>-1</sup>, respectively, leading to a peak separation of 25.2 cm<sup>-1</sup>. In contrast, the  $E_{2g}^1$  mode of MSBV<sub>50wt%</sub> upshifts from 382.5 to 385.0 cm<sup>-1</sup>, creating a peak separation of 22.7 cm<sup>-1</sup>.

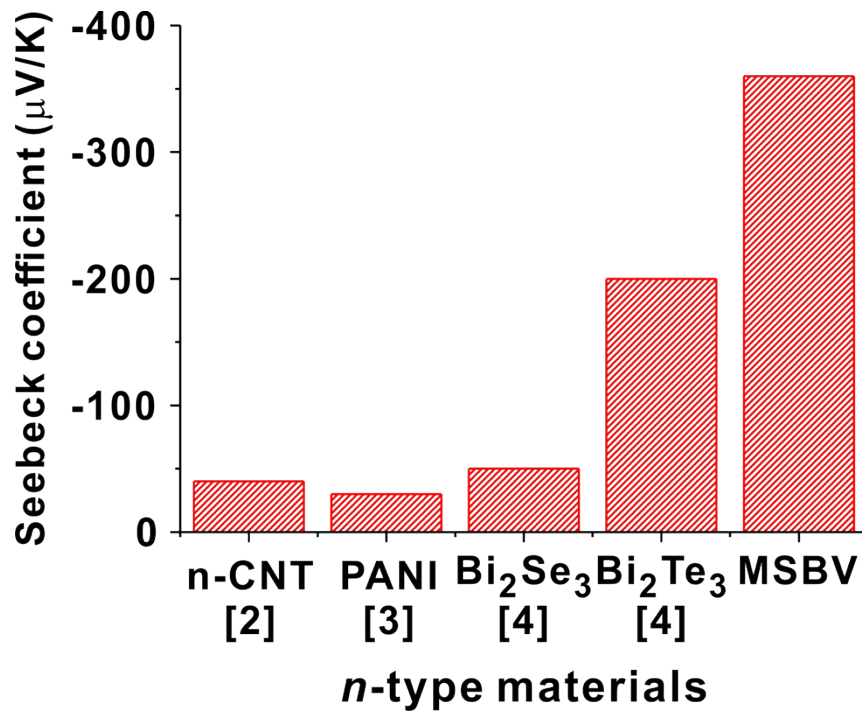

**Fig. S5** Seebeck coefficient of  $\text{MSBV}_{50\text{wt}\%}$  and conventional n-type thermoelectric materials at room temperature.

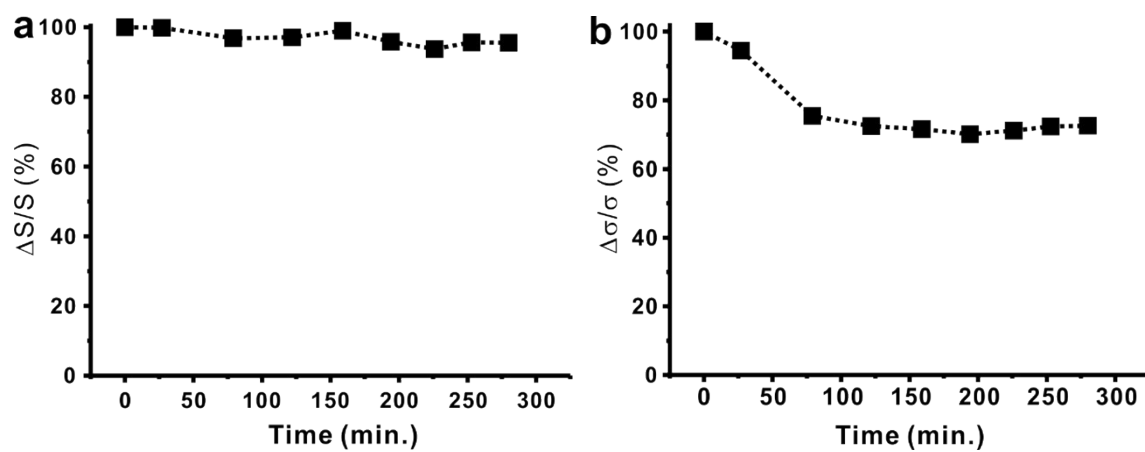

**Fig. S6** (a) Seebeck coefficient and (b) electrical conductivity of MSBV50wt% as a function of time.

**Table S1.** Energy shift of XPS core levels in MSBV<sub>50wt%</sub> before and after BV doping.

| Peaks                | Binding energy (eV) |                 | Binding energy shift (eV) |
|----------------------|---------------------|-----------------|---------------------------|
|                      | Before BV doping    | After BV doping |                           |
| Mo 3d <sub>5/2</sub> | 229.48              | 229.71          | +0.23                     |
| Mo 3d <sub>3/2</sub> | 232.63              | 232.85          | +0.22                     |
| S 2p <sub>3/2</sub>  | 162.30              | 162.56          | +0.26                     |
| S 2p <sub>1/2</sub>  | 163.50              | 163.79          | +0.29                     |



**Table S2.** Carrier properties of the bulk MoS<sub>2</sub>, MSBV<sub>0wt%</sub>, MSBV<sub>50wt%</sub>, and previous *n*-doped MoS<sub>2</sub> monolayers.

|                                                          | Hall mobility (cm <sup>2</sup> ·V <sup>-1</sup> ·s <sup>-1</sup> ) | Bulk carrier concentration (cm <sup>-3</sup> ) | Sheet carrier concentration (cm <sup>-2</sup> ) |
|----------------------------------------------------------|--------------------------------------------------------------------|------------------------------------------------|-------------------------------------------------|
| Bulk MoS <sub>2</sub>                                    | 1.40                                                               | 8.77×10 <sup>13</sup>                          | 9.21×10 <sup>11</sup>                           |
| MSBV <sub>0wt%</sub>                                     | 2.30                                                               | 2.77×10 <sup>13</sup>                          | 2.63×10 <sup>11</sup>                           |
| MSBV <sub>50wt%</sub>                                    | 2.39                                                               | 2.97×10 <sup>14</sup>                          | 2.52×10 <sup>12</sup>                           |
| Cl-MoS <sub>2</sub> 1L [5]                               | 60.0                                                               | N.A.                                           | 9.2×10 <sup>12</sup>                            |
| Cs <sub>2</sub> CO <sub>3</sub> -MoS <sub>2</sub> 1L [6] | 4                                                                  | N.A.                                           | 3.5×10 <sup>11</sup>                            |
| BV-MoS <sub>2</sub> 1L [7]                               | 24.7                                                               | N.A.                                           | 1.2×10 <sup>13</sup>                            |
| APTMS-MoS <sub>2</sub> 1L [8]                            | 2.06                                                               | N.A.                                           | 7.2×10 <sup>12</sup>                            |

**Table S3.** S/Mo and O/Mo area ratios of the bulk MoS<sub>2</sub>, MSBV<sub>50wt%</sub>, and MSBV<sub>50wt%</sub> annealed at 280 °C. Note that they were calculated by measuring the ratios of the peak areas and correcting them for sensitivity factors to obtain corrected peak area ratios.

|                       | S/Mo | O/Mo<br>(total) | O/Mo<br>(MoO <sub>3</sub> ) | O/Mo<br>(MoO <sub>2</sub> ) |
|-----------------------|------|-----------------|-----------------------------|-----------------------------|
| Bulk MoS <sub>2</sub> | 1.90 | 0.0907          | 0.0707                      | 0.0200                      |
| MSBV                  | 2.01 | 0.0874          | 0.0647                      | 0.0227                      |
| Annealed MSBV         | 1.20 | 0.733           | 0.613                       | 0.120                       |

## References

- (1) C. Lee, H. Yan, L. E. Brus, T. F. Heinz, J. Hone and S. Ryu, *ACS Nano*, 2010, **4**, 2695-2700.
- (2) T. Fukumaru, T. Fujigaya and N. Nakashima, *Sci. rep.*, 2015, **5**, 7951.
- (3) N. Mateeva, H. Niculescu, J. Schlenoff and L. R. Testardi, *J. Appl. Phys.*, 1998, **83**, 3111-3117.
- (4) Y. Min, J. W. Roh, H. Yang, M. Park, S. I. Kim, S. Hwang, S. M. Lee, K. H. Lee and U. Jeong, *Adv. Mater.*, 2013, **25**, 1425-1429.
- (5) L. Yang, K. Majumdar, H. Liu, Y. Du, H. Wu, M. Hatzistergos, P. Y. Hung, R. Tieckelmann, W. Tsai, C. Hobbs and P. D. Ye, *Nano Lett.*, 2014, **14**, 6275-6280.
- (6) J. D. Lin, C. Han, F. Wang, R. Wang, D. Xiang, S. Qin, X.-A. Zhang, L. Wang, H. Zhang, A. T. S. Wee and W. Chen, *ACS Nano*, 2014, **8**, 5323-5329.
- (7) D. Kiriya, M. Tosun, P. Zhao, J. S. Kang and A. Javey, *J. Am. Chem. Soc.*, 2014, **136**, 7853-7856.
- (8) Y. Li, C.-Y. Xu, P. Hu and L. Zhen, *ACS Nano*, 2013, **7**, 7795-7804.
